# Supplementary material
Source: ML conference proceedings conference paper supplement (https://proceedings.neurips.cc/paper_files/paper/2008/hash/0336dcbab05b9d5ad24f4333c7658a0e-Abstract.html)
Supplement: Supplementary file [file 0336dcbab05b9d5ad24f4333c7658a0e-Supplemental.zip]

## Cutoff Averaging: Technical Appendix

### A Proof of Thm. 1: A Regret Bound for Margin-Based Perceptron

*Proof.* Throughout this proof,  $\ell$  denotes the hinge loss. We define  $\Delta_i = \|\mathbf{u} - \mathbf{w}_{i-1}\|^2 - \|\mathbf{u} - \mathbf{w}_i\|^2$  and prove the theorem by proving upper and lower bounds on  $\sum_{i=1}^m \Delta_i$ . Beginning with the upper bound, we notice that  $\sum_{i=1}^m \Delta_i$  is a telescopic sum that collapses to

$$\sum_{i=1}^m \Delta_i = \|\mathbf{u} - \mathbf{w}_0\|^2 - \|\mathbf{u} - \mathbf{w}_m\|^2 .$$

Neglecting  $\|\mathbf{u} - \mathbf{w}_m\|^2$  and using the facts that  $\mathbf{w}_0 = (0, \dots, 0)$  and that  $\|\mathbf{u}\| \leq 1$ , we obtain the upper bound

$$\sum_{i=1}^m \Delta_i \leq 1 . \quad (5)$$

Moving on to the lower bound, we focus on rounds where  $\ell(\mathbf{w}_{i-1}; (\mathbf{x}_i, y_i)) > 0$ . We rewrite  $\Delta_i$  as  $\alpha_i + \beta_i$ , where

$$\alpha_i = \|\mathbf{u} - \mathbf{w}_{i-1}\|^2 - \|\mathbf{u} - \mathbf{w}'_{i-1}\|^2 \quad \text{and} \quad \beta_i = \|\mathbf{u} - \mathbf{w}'_{i-1}\|^2 - \|\mathbf{u} - \mathbf{w}_i\|^2 .$$

Setting  $\eta = 1/(\sqrt{m}R)$ , we can rewrite  $\alpha_i$  as

$$\begin{aligned} \alpha_i &= \|\mathbf{u} - \mathbf{w}_{i-1}\|^2 - \|\mathbf{u} - \mathbf{w}_{i-1} - \eta y_i \mathbf{x}_i\|^2 \\ &= 2\eta (y_i \langle \mathbf{u}, \mathbf{x}_i \rangle - y_i \langle \mathbf{w}_{i-1}, \mathbf{x}_i \rangle) - \eta^2 \|\mathbf{x}_i\|^2 , \end{aligned} \quad (6)$$

where the first inequality follows from the definition of  $\mathbf{w}'_{i-1}$  and the second equality is straightforward linear algebra. Next, we combine the term in Eq. (6) with three additional facts: (1) by assumption  $\|\mathbf{x}_i\| \leq R$ , (2) by the assumption that  $\ell(\mathbf{w}_{i-1}; (\mathbf{x}_i, y_i)) > 0$  and using the definition of the hinge loss, we have  $\ell(\mathbf{w}_{i-1}; (\mathbf{x}_i, y_i)) = 1 - y_i \langle \mathbf{w}_{i-1}, \mathbf{x}_i \rangle$ , and (3) by the definition of the hinge loss  $\ell(\mathbf{u}; (\mathbf{x}_i, y_i)) \geq 1 - y_i \langle \mathbf{u}, \mathbf{x}_i \rangle$ . We obtain the lower bound

$$\alpha_i \geq 2\eta \left( -\ell(\mathbf{u}; (\mathbf{x}_i, y_i)) + \ell(\mathbf{w}_{i-1}; (\mathbf{x}_i, y_i)) \right) - \eta^2 R^2 .$$

Next we prove that  $\beta_i$  is always non-negative. If  $1 \leq \frac{1}{\|\mathbf{w}'_{i-1}\|}$  then this claim is an immediate consequence of the definition of  $\mathbf{w}_i$ . Otherwise, it holds that  $\|\mathbf{w}'_{i-1}\| \geq 1$ ,  $\mathbf{w}_i = \mathbf{w}'_{i-1}/\|\mathbf{w}'_{i-1}\|$ , and we have that

$$\begin{aligned} \beta_i &= \|\mathbf{u} - \mathbf{w}'_{i-1}\|^2 - \left\| \mathbf{u} - \frac{\mathbf{w}'_{i-1}}{\|\mathbf{w}'_{i-1}\|} \right\|^2 \\ &= -2 \left( 1 - \frac{1}{\|\mathbf{w}'_{i-1}\|} \right) \langle \mathbf{u}, \mathbf{w}'_{i-1} \rangle + \|\mathbf{w}'_{i-1}\|^2 - 1 . \end{aligned} \quad (7)$$

Using the Cauchy-Schwartz inequality and the assumption that  $\|\mathbf{u}\| \leq 1$ , we lower bound the term

$$-2 \left( 1 - \frac{1}{\|\mathbf{w}'_{i-1}\|} \right) \langle \mathbf{u}, \mathbf{w}'_{i-1} \rangle$$

with  $-2\|\mathbf{w}'_{i-1}\| + 2$ . Plugging this lower bound into Eq. (7) gives

$$\beta_i \geq 1 - 2\|\mathbf{w}'_{i-1}\| + \|\mathbf{w}'_{i-1}\|^2 = (1 - \|\mathbf{w}'_{i-1}\|)^2 .$$

We have proven that  $\beta_i$  is non-negative and we conclude that

$$\Delta_i \geq 2\eta \left( -\ell(\mathbf{u}; (\mathbf{x}_i, y_i)) + \ell(\mathbf{w}_{i-1}; (\mathbf{x}_i, y_i)) \right) - \eta^2 R^2 . \quad (8)$$

Note that the above holds trivially whenever  $\ell(\mathbf{w}_{i-1}; (\mathbf{x}_i, y_i)) = 0$ , and therefore the above holds for all  $i$ . Summing  $\Delta_i$  over all  $i$ , we get

$$\sum_{i=1}^m \Delta_i \geq -2\eta \sum_{i=1}^m \ell(\mathbf{u}; (\mathbf{x}_i, y_i)) + 2\eta \sum_{i=1}^m \ell(\mathbf{w}_{i-1}; (\mathbf{x}_i, y_i)) - m\eta^2 R^2 .$$

Comparing the above to the upper bound in Eq. (5) and rearranging terms gives the bound

$$\frac{1}{m} \sum_{i=1}^m \ell(\mathbf{w}_{i-1}; (\mathbf{x}_i, y_i)) \leq \frac{1}{m} \sum_{i=1}^m \ell(\mathbf{u}; (\mathbf{x}_i, y_i)) + \frac{1}{2m\eta} + \frac{\eta R^2}{2} .$$

Recalling that  $\eta = 1/(\sqrt{m}R)$  proves the bound.  $\square$

## B Proof of Lemma 1: An Adaptation of Freedman's Bound

The following is a detailed proof of Lemma 1. We show that the lemma is a direct corollary from Freedman's tail bound for martingales [6]. This proof is adapted from the work of Cesa-Bianchi and Gentile in [3, Proposition 2] with two exceptions: First we use the full power of Freedman's theorem and prove a Kolmogorov-type maximal inequality, namely, an inequality that holds uniformly for any prefix of the random variable sequence. Second, we build on Freeman's original bound, as it appears in [6], rather than the slightly different version used in [3].

One of the straightforward techniques used in our proof is the *square root trick*. There is really nothing tricky about this elementary technique: it involves finding the positive root of a second-degree polynomial, in order to satisfy a quadratic constraint. The term "square root trick" has been coined elsewhere and we stick with this name.

**Lemma 2.** *Let  $b$  and  $c$  be positive numbers. Then,*

$$(1) \quad x^2 - bx - c > 0 \text{ and } x \geq 0 \iff x > \frac{b + \sqrt{b^2 + 4c}}{2}$$

$$(2) \quad x^2 - bx - c < 0 \text{ and } x \geq 0 \iff 0 \leq x < \frac{b + \sqrt{b^2 + 4c}}{2}$$

*Proof.* The left-hand side of (1) above is a second degree polynomial in  $x$  with a positive leading term, one negative root  $N$  and one positive root  $P$ . Therefore, it is positive in the region  $(-\infty, N) \cup (P, \infty)$ . Intersecting this constraint with  $x \geq 0$ , gives  $x > P$ . Equivalently, the left-hand side of (2) is negative between  $N$  and  $P$ . Intersecting this constraint with  $x \geq 0$  results in the constraint  $0 \leq x < P$ . In both cases, the value of  $P$  can be calculated using the quadratic formula.  $\square$

For completeness, we give Freedman's original theorem:

**Theorem 3** (Freedman, [6]). *Let  $(A_i)_{i=0}^m$  be a martingale with respect to  $(Z_i)_{i=1}^m$ . Let  $B_i = A_i - A_{i-1}$  be the corresponding sequence of martingale differences and let  $D_i = \text{Var}[B_i | (Z_j)_{j=1}^{i-1}]$  be the corresponding sequence of conditional variances. Assume  $|B_i| \leq 1$  for all  $i$ . For any positive numbers  $a$  and  $b$ ,*

$$\Pr \left( \exists t \quad \sum_{i=1}^t B_i \geq a, \quad \sum_{i=1}^t D_i \leq b \right) \leq \exp \left( -\frac{a^2}{2(a+b)} \right).$$

We are now ready to prove Lemma 1.

*Proof of Lemma 1.* Define, for all  $i \in \{1, \dots, m\}$

$$B_i = \frac{U_i - L_i}{C} \quad \text{and} \quad V_i = \text{Var} [B_i | (Z_j)_{j=1}^{i-1}].$$

Note that  $(B_i)_{i=1}^m$  is a sequence of martingale differences with respect to  $(Z_i)_{i=1}^m$ , and that  $|B_i| \leq 1$  for all  $i$ . For brevity, define  $\alpha = \ln(\frac{m}{\delta})$ . We begin by examining the probability

$$\Pr \left( \exists t \quad \sum_{i=1}^t B_i \geq \alpha + \sqrt{\alpha^2 + 2\alpha \left(1 + \sum_{i=1}^t V_i\right)} \right).$$

Since  $|B_i| \leq 1$ , it holds that  $\sum_{i=1}^m V_i \leq m$ . Therefore, we can upper-bound the above by

$$\sum_{s=1}^m \Pr \left( \exists t \quad \sum_{i=1}^t B_i \geq \alpha + \sqrt{\alpha^2 + 2\alpha s}, \quad \sum_{i=1}^t V_i \leq s \right).$$

Each summand above satisfies the requirements of Freedman's bound, Thm. 3. Applying the theorem for each summand gives the upper bound

$$\sum_{s=1}^m \exp \left( -\frac{(\alpha + \sqrt{\alpha^2 + 2\alpha s})^2}{2(\alpha + \sqrt{\alpha^2 + 2\alpha s} + s)} \right) = \sum_{s=1}^m \exp(-\alpha) = \delta.$$

Overall, we have proven that, with probability at least  $1 - \delta$ , it holds that

$$\forall t \quad \sum_{i=1}^t B_i < \alpha + \sqrt{\alpha^2 + 2\alpha(1 + \sum_{i=1}^t V_i)} , \quad (9)$$

Given a concrete value of  $(Z_j)_{j=1}^{i-1}$ ,  $U_i$  is just a constant and does not effect the variance. Therefore,

$$V_i = \frac{\text{Var}[L_i | (Z_j)_{j=1}^{i-1}]}{C^2} \leq \frac{\mathbb{E}[L_i^2 | (Z_j)_{j=1}^{i-1}]}{C^2} \leq \frac{\mathbb{E}[L_i | (Z_j)_{j=1}^{i-1}]}{C} = \frac{U_i}{C} .$$

where the first inequality follows from the definition of variance, the second inequality follows from the fact that  $L_i \in [0, C]$ , and the last equality uses the definition of  $U_i$ . Plugging this bound into Eq. (9), we have

$$\forall t \quad \sum_{i=1}^t B_i < \alpha + \sqrt{\alpha^2 + 2\alpha \left(1 + \frac{1}{C} \sum_{i=1}^t U_i\right)} .$$

Using the definition of  $B_i$  and the fact that  $\sqrt{a+b} \leq \sqrt{a} + \sqrt{b}$ , we have

$$\forall t \quad \frac{1}{C} \sum_{i=1}^t U_i - \frac{1}{C} \sum_{i=1}^t L_i < 2\alpha + \sqrt{2\alpha \left(1 + \frac{1}{C} \sum_{i=1}^t U_i\right)} .$$

Focus for a moment on one value of  $t$ . Substituting  $\gamma = \sqrt{1 + \frac{1}{C} \sum_{i=1}^t U_i}$  and  $\lambda = \frac{1}{C} \sum_{i=1}^t L_i$ , the above can be rewritten as the following quadratic constraint on  $\gamma$

$$\gamma^2 - \sqrt{2\alpha}\gamma - (2\alpha + \lambda + 1) < 0 .$$

Using the square-root trick, outlined in Lemma 2, the above is equivalent to

$$\gamma < \frac{\sqrt{2\alpha} + \sqrt{10\alpha + 4\lambda + 4}}{2} .$$

Taking the square of both sides above, we get

$$\gamma^2 < 3\alpha + \lambda + 1 + \sqrt{5\alpha^2 + 2\alpha\lambda + 2\alpha} .$$

Once again using the inequality  $\sqrt{a+b+c} \leq \sqrt{a} + \sqrt{b} + \sqrt{c}$ , we get

$$\gamma^2 < \lambda + (3 + \sqrt{5})\alpha + \sqrt{2\alpha\lambda} + \sqrt{2\alpha} .$$

Finally, assuming  $m \geq 4$  we have that  $\alpha > \sqrt{\alpha}$  and therefore

$$\gamma^2 < \lambda + (3 + \sqrt{5} + \sqrt{2})\alpha + \sqrt{2\alpha\lambda} .$$

Plugging in the definitions of  $\gamma$  and  $\lambda$  and using  $3 + \sqrt{5} + \sqrt{2} < 7$  concludes the proof.  $\square$
